# Supplementary material for: Exploration of fine-scale recombination rate variation in the domestic horse
Source: PubMed Central journal article supplement — Genome Res. 2019 Oct;29(10):1744–52. doi: 10.1101/gr.243311.118 (PMC6771410; doi:10.1101/gr.243311.118), 2019-10
Supplement: supp_gr.243311.118_Supplemental_Fig_S1.pdf [file supp_gr.243311.118_Supplemental_Fig_S1.pdf]

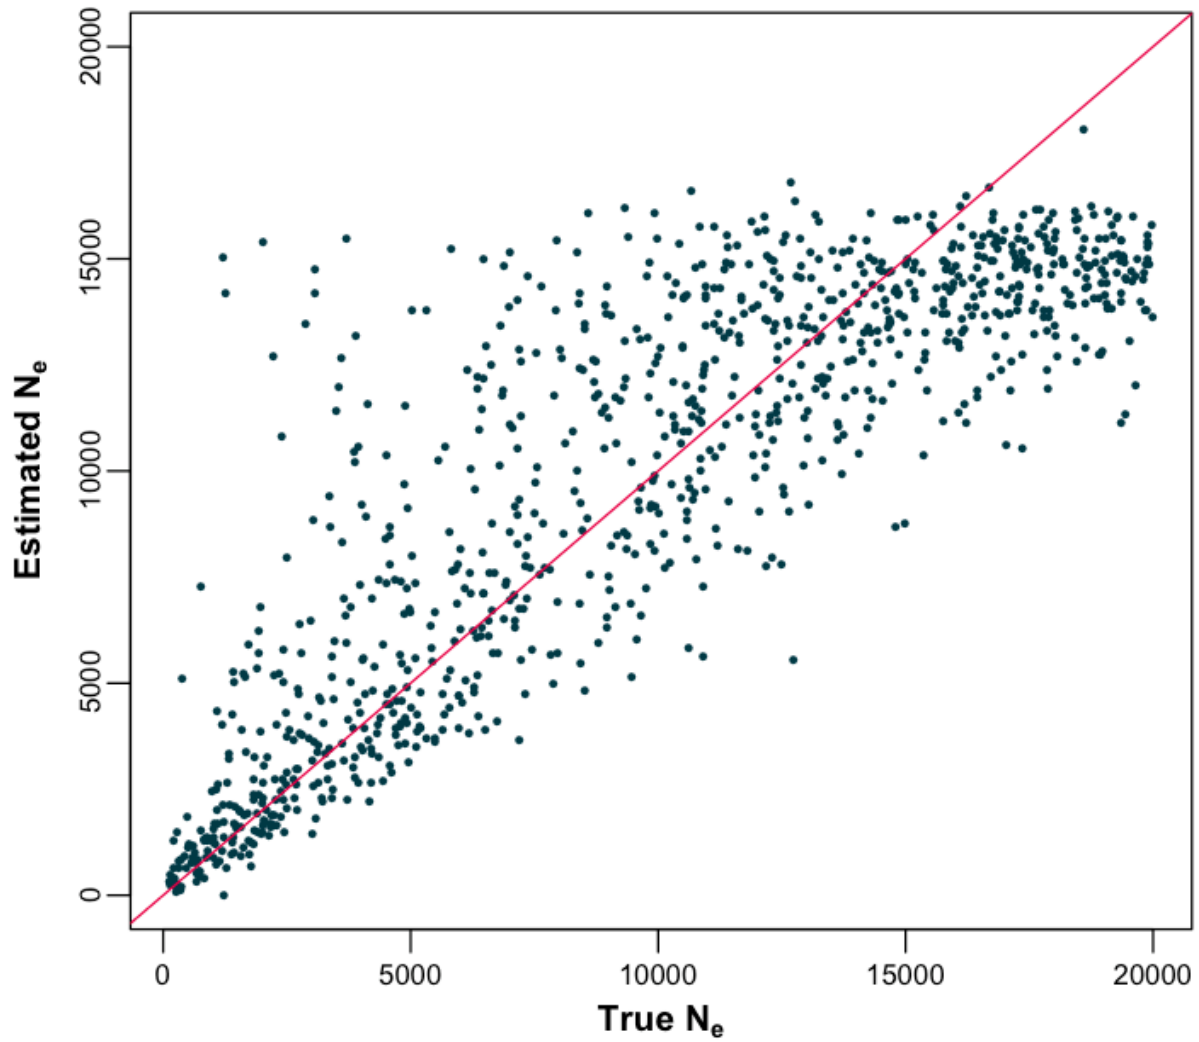

**Supplemental Figure S1.** Cross-validation of effective population size ( $N_e$ ) estimations using gradient boosting regression. Individual dots represent a single estimate based on simulated data with known contemporary  $N_e$ . The red line represents perfect agreement between true  $N_e$  and estimated  $N_e$  ( $y = x$ ).
