# Supplementary material for: Exploration of fine-scale recombination rate variation in the domestic horse
Source: PubMed Central journal article supplement — Genome Res. 2019 Oct;29(10):1744–52. doi: 10.1101/gr.243311.118 (PMC6771410; doi:10.1101/gr.243311.118), 2019-10
Supplement: supp_gr.243311.118_Supplemental_Fig_S2.pdf [file supp_gr.243311.118_Supplemental_Fig_S2.pdf]

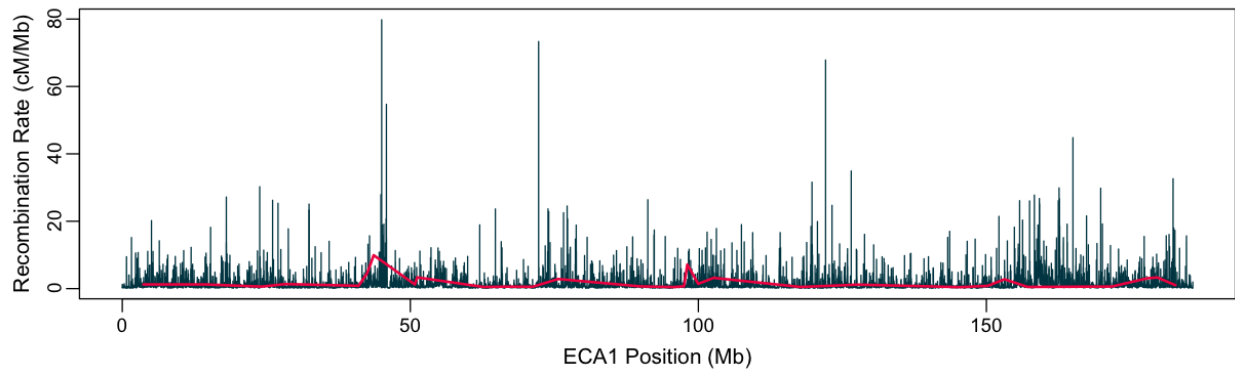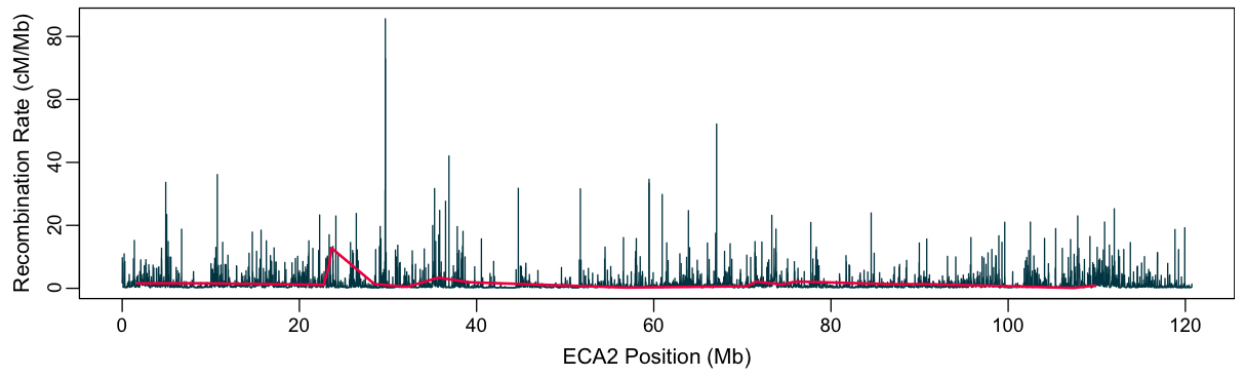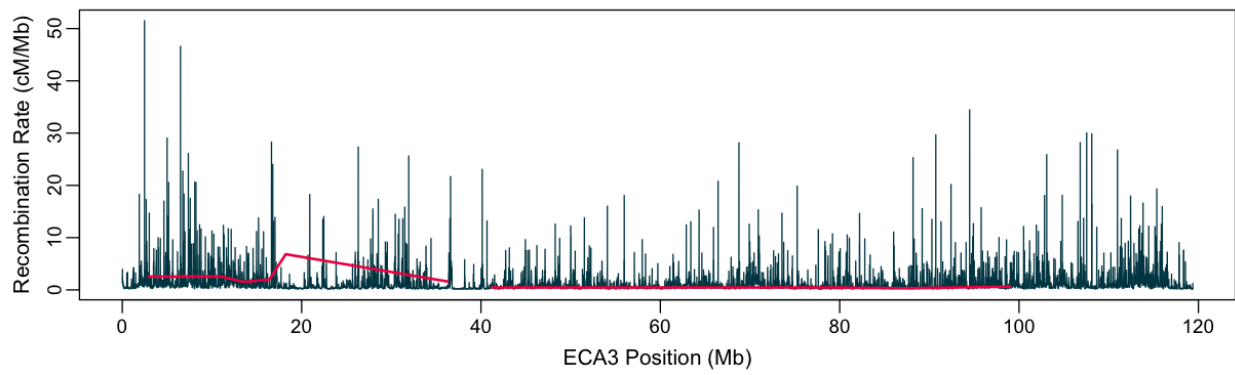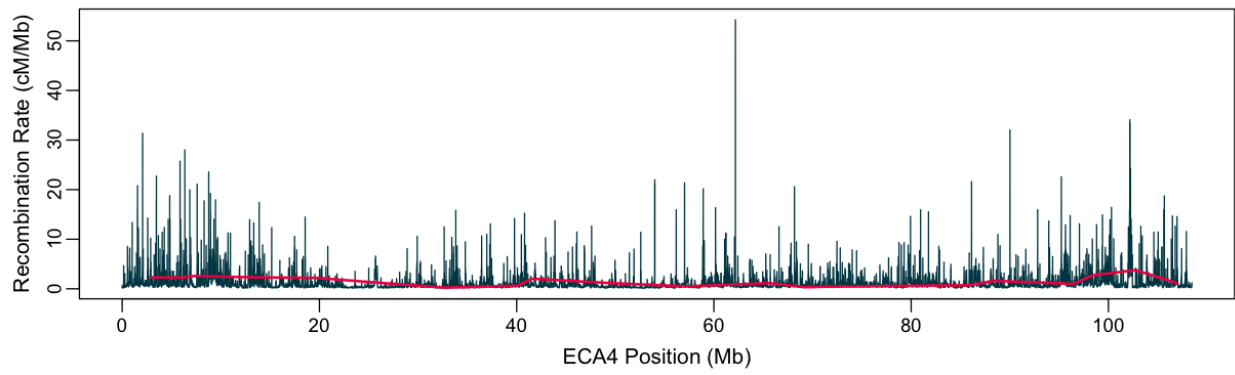

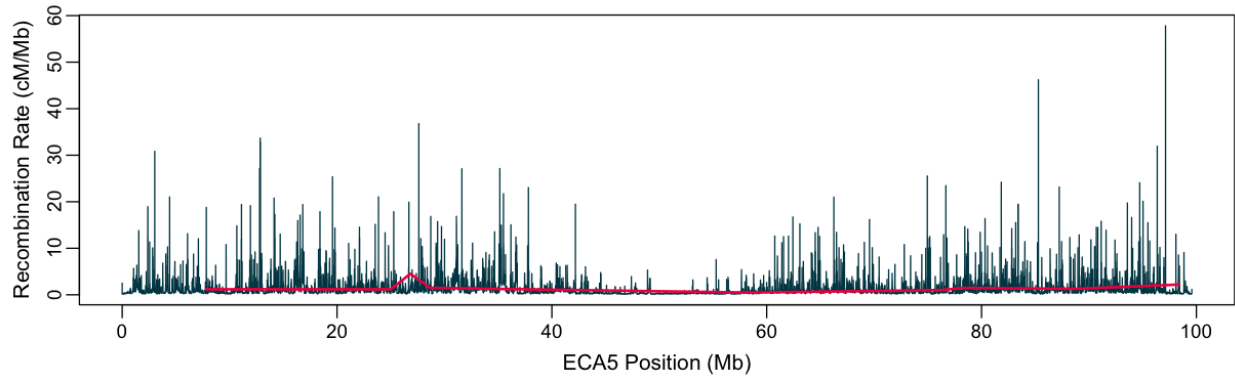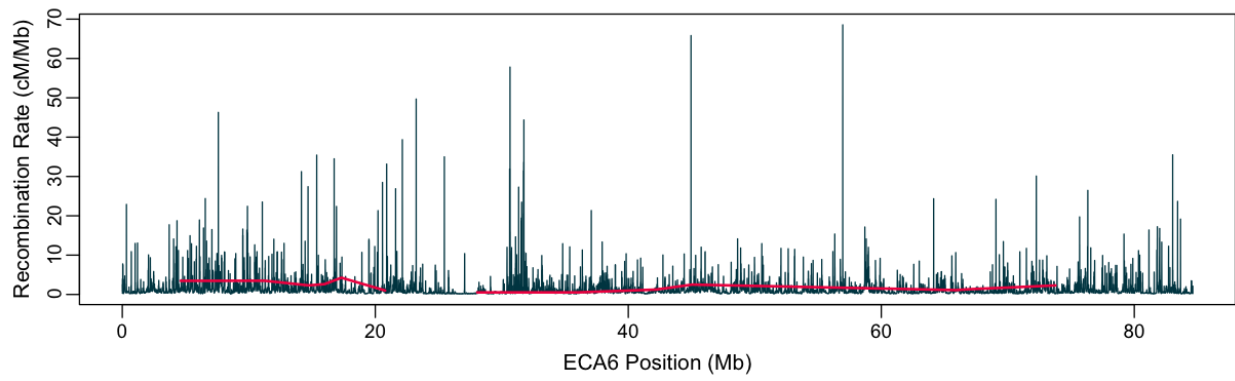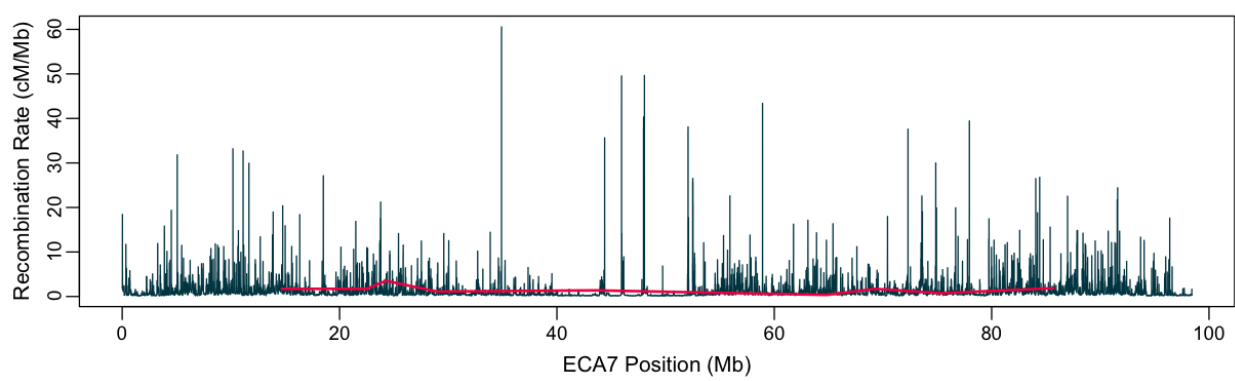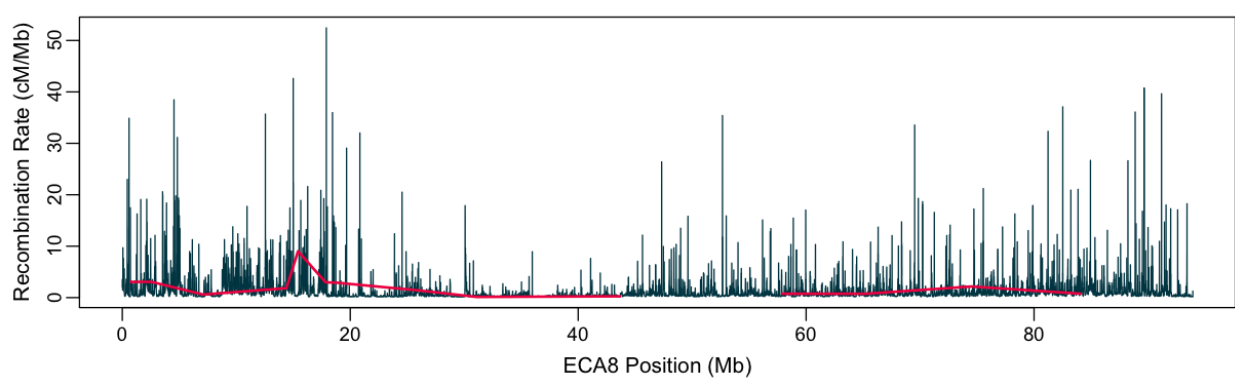

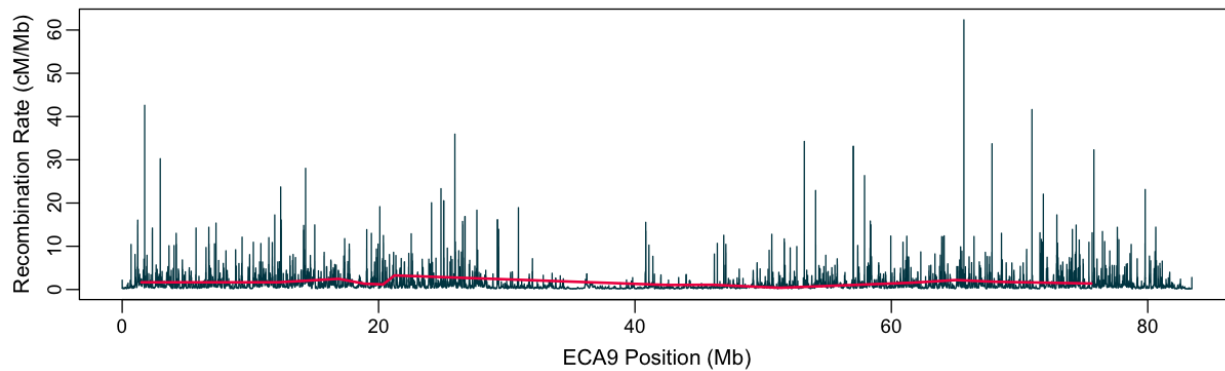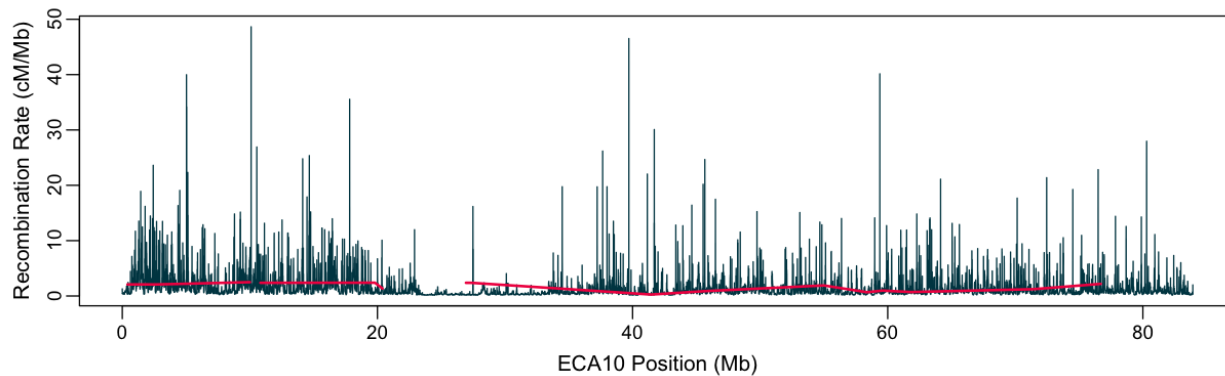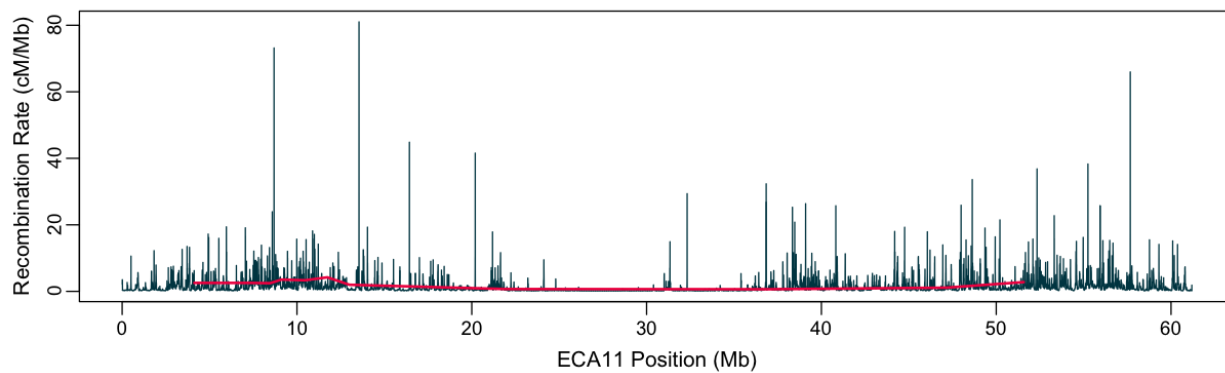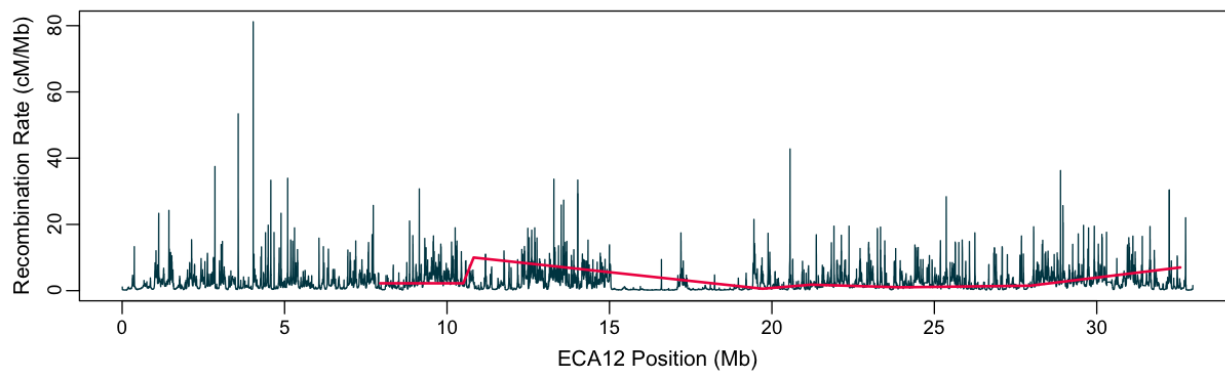

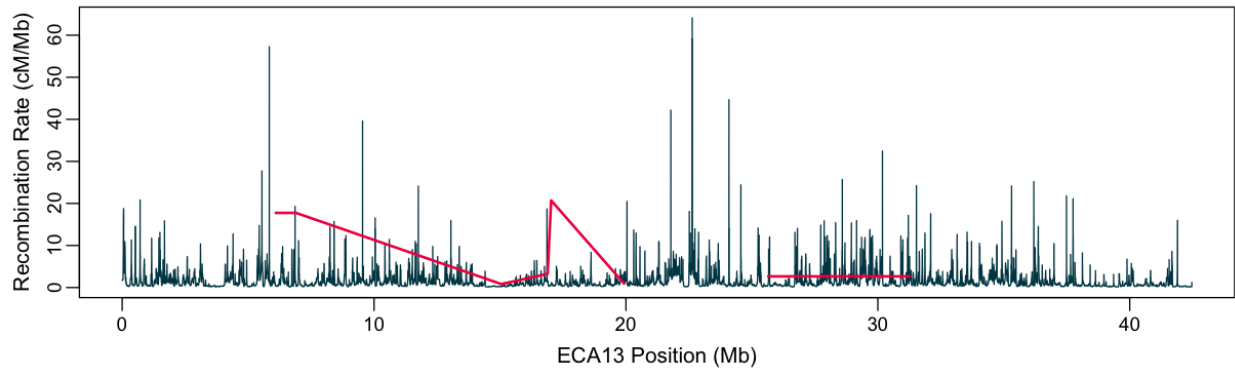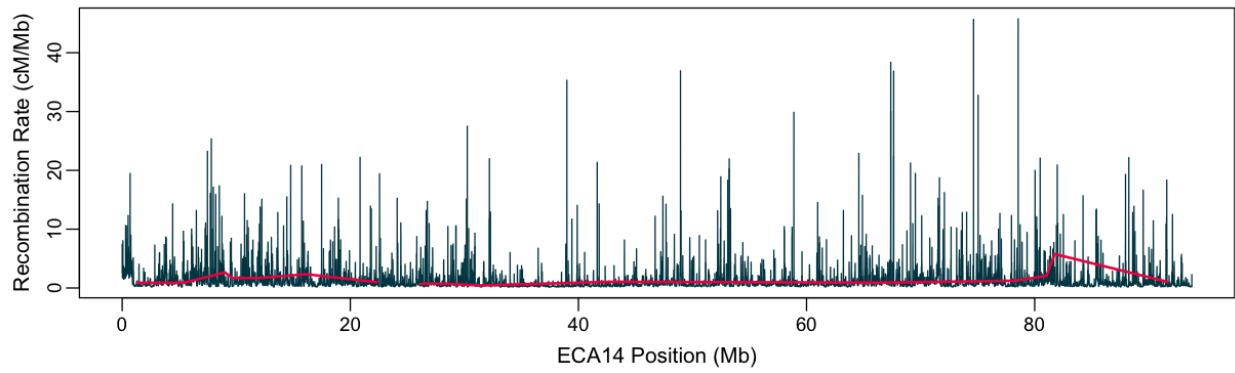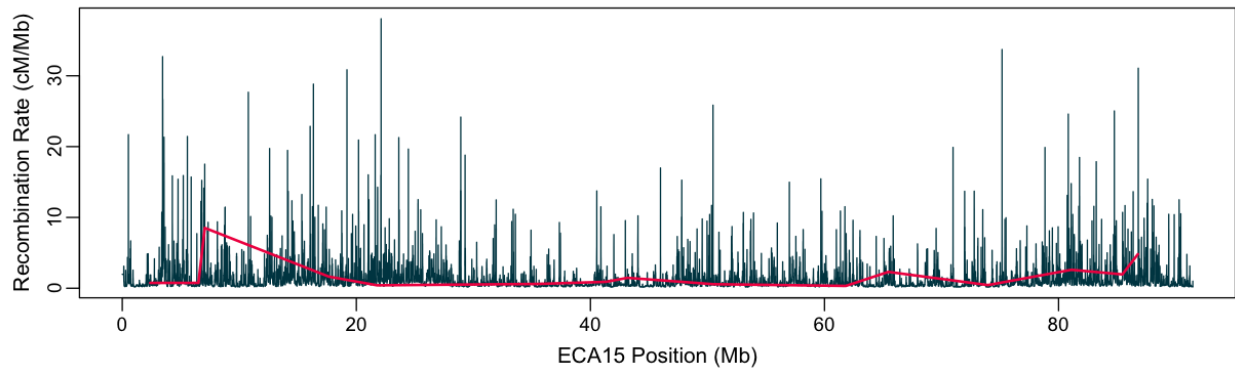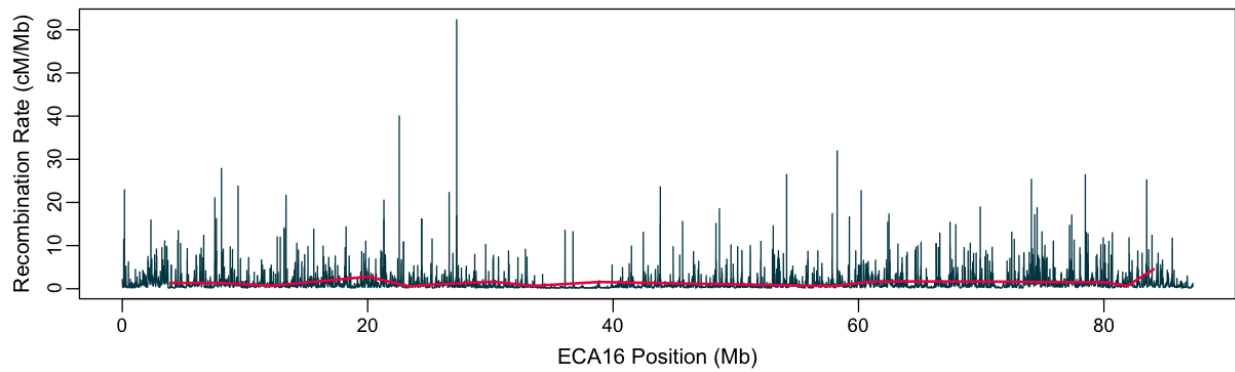

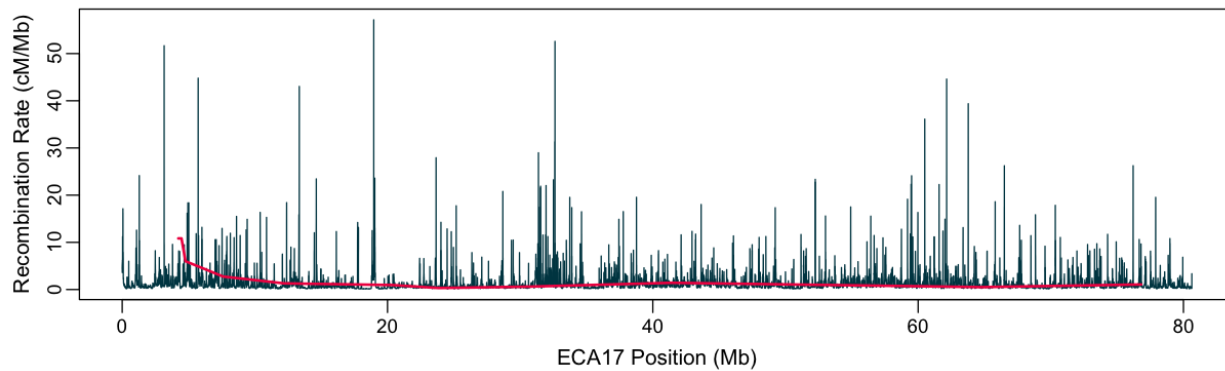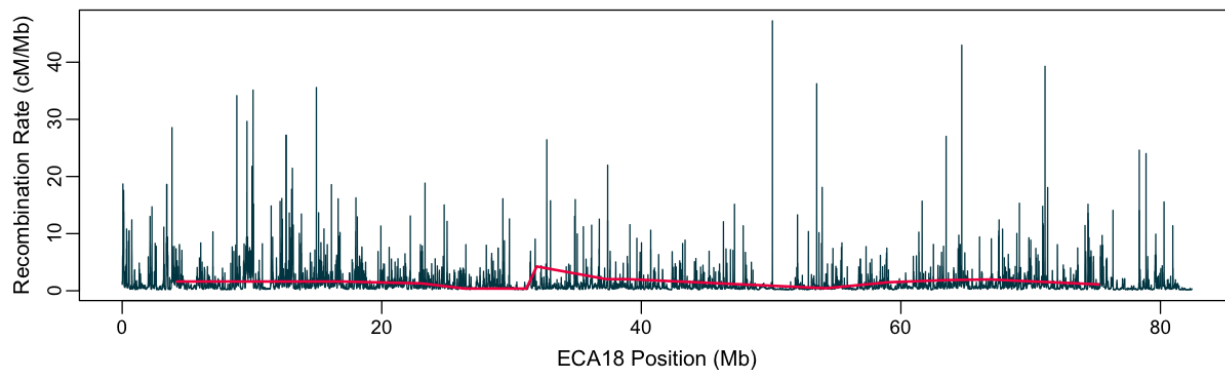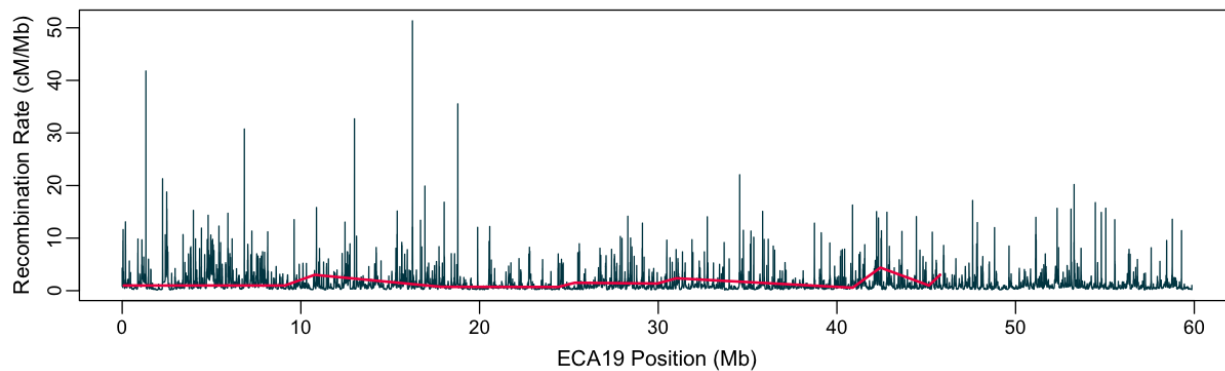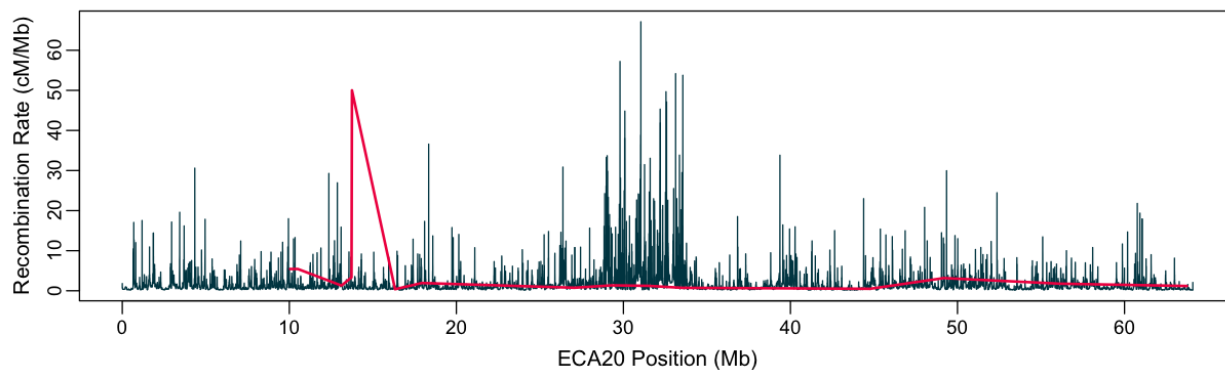

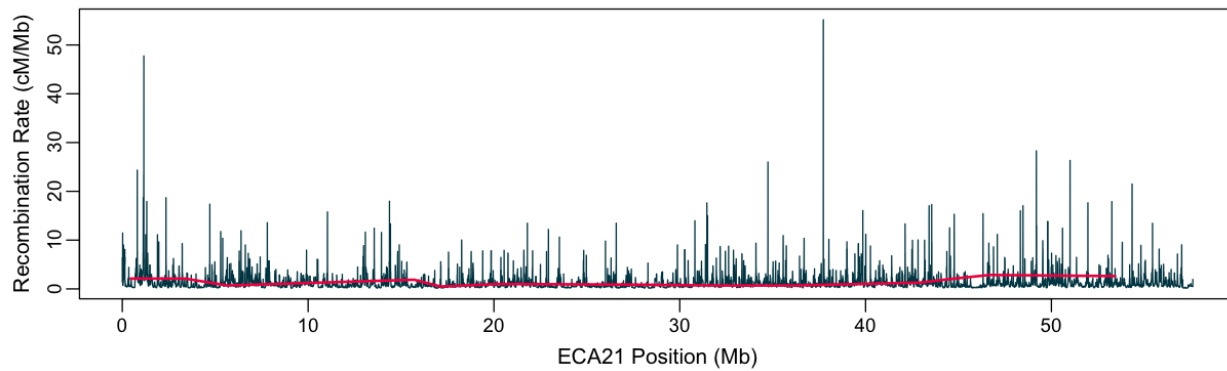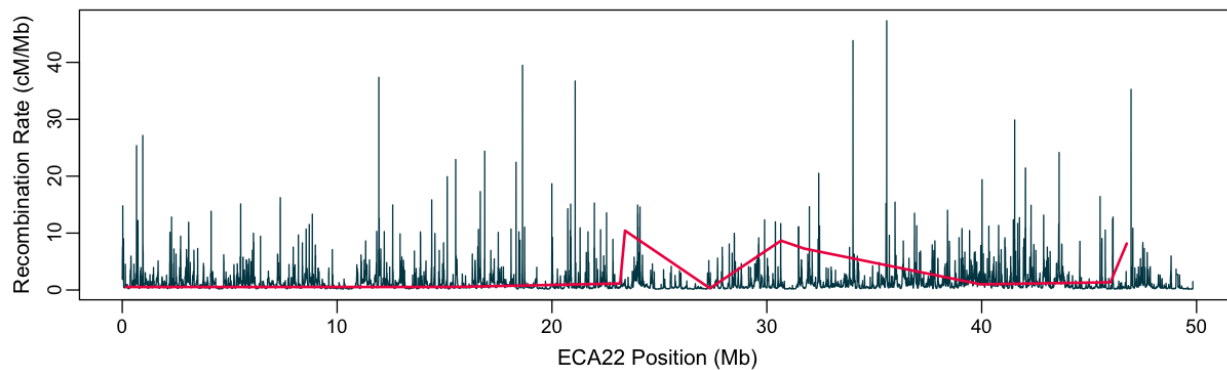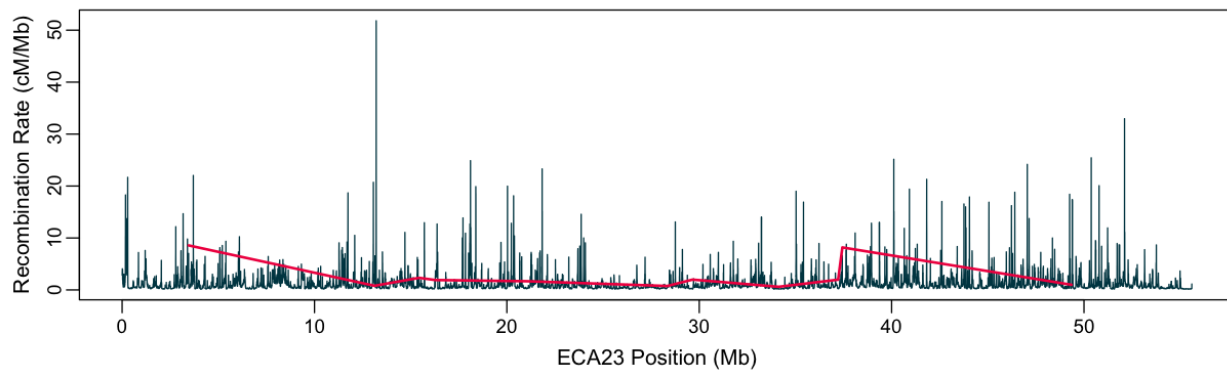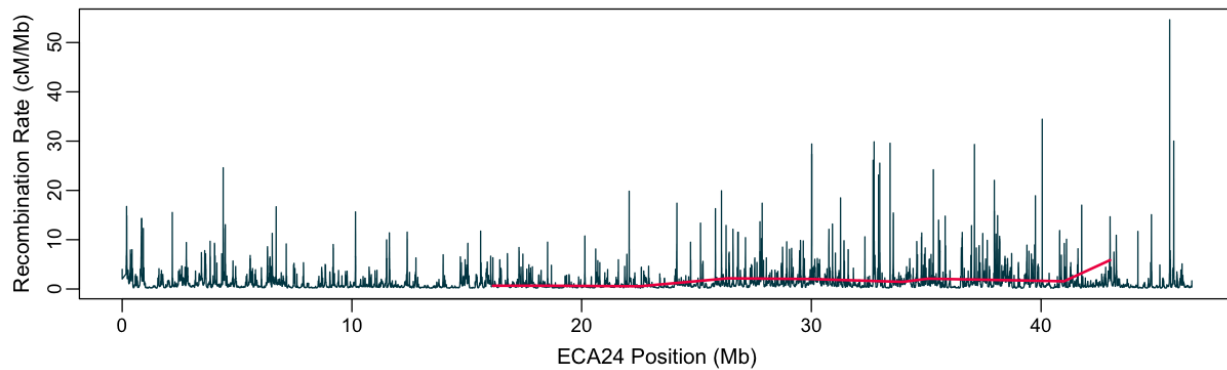

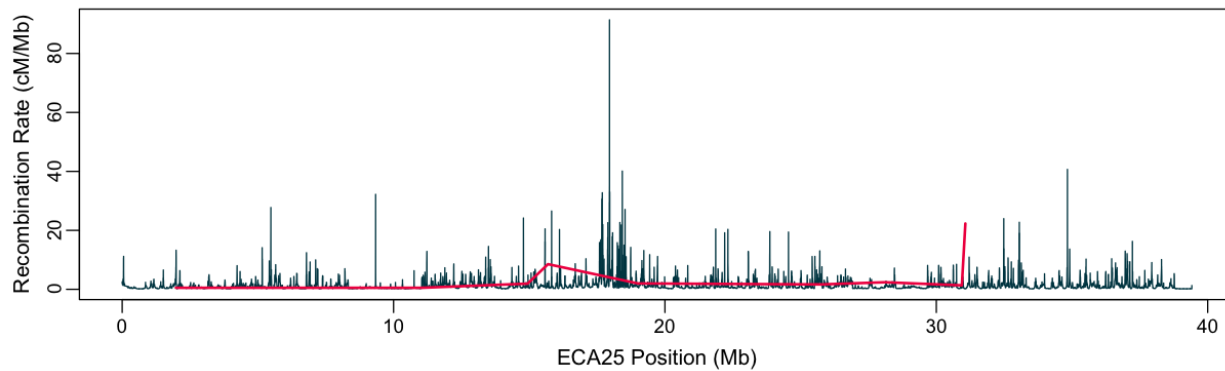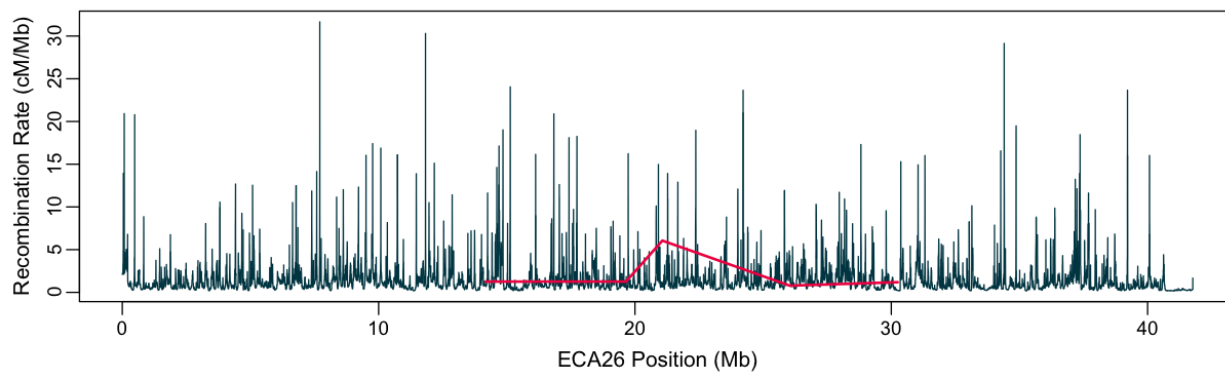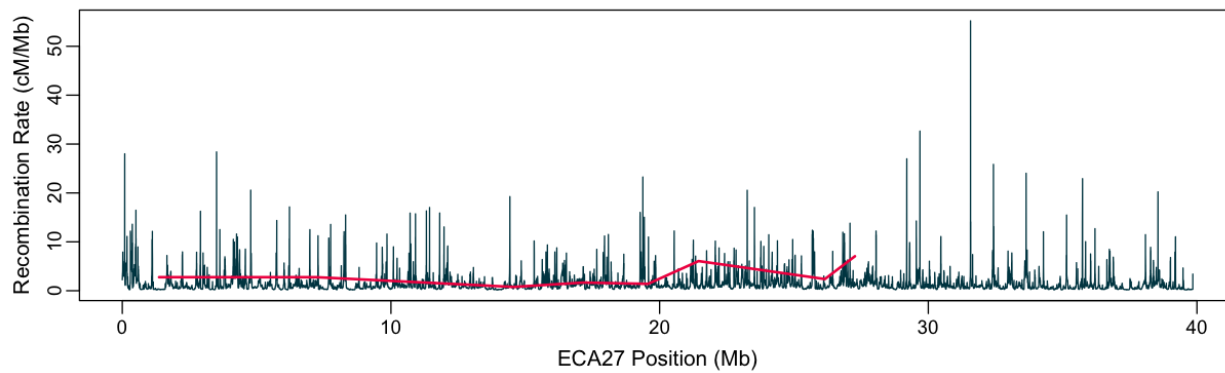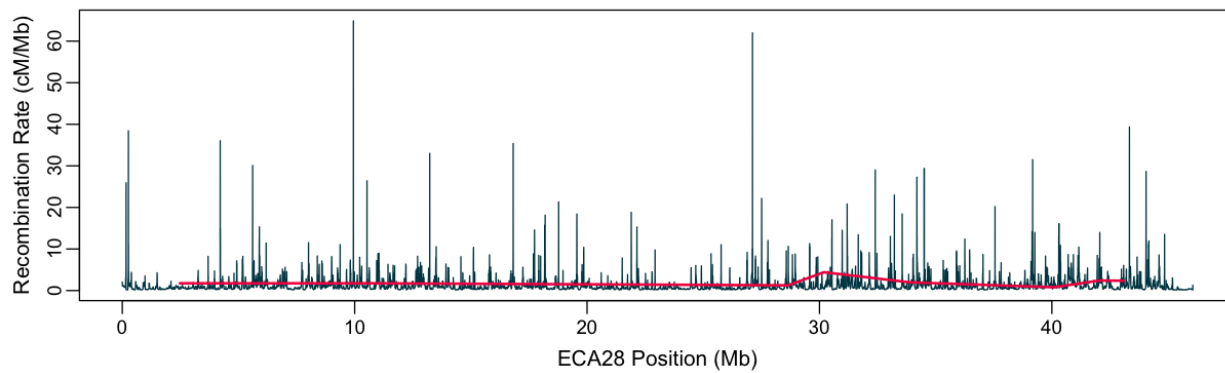

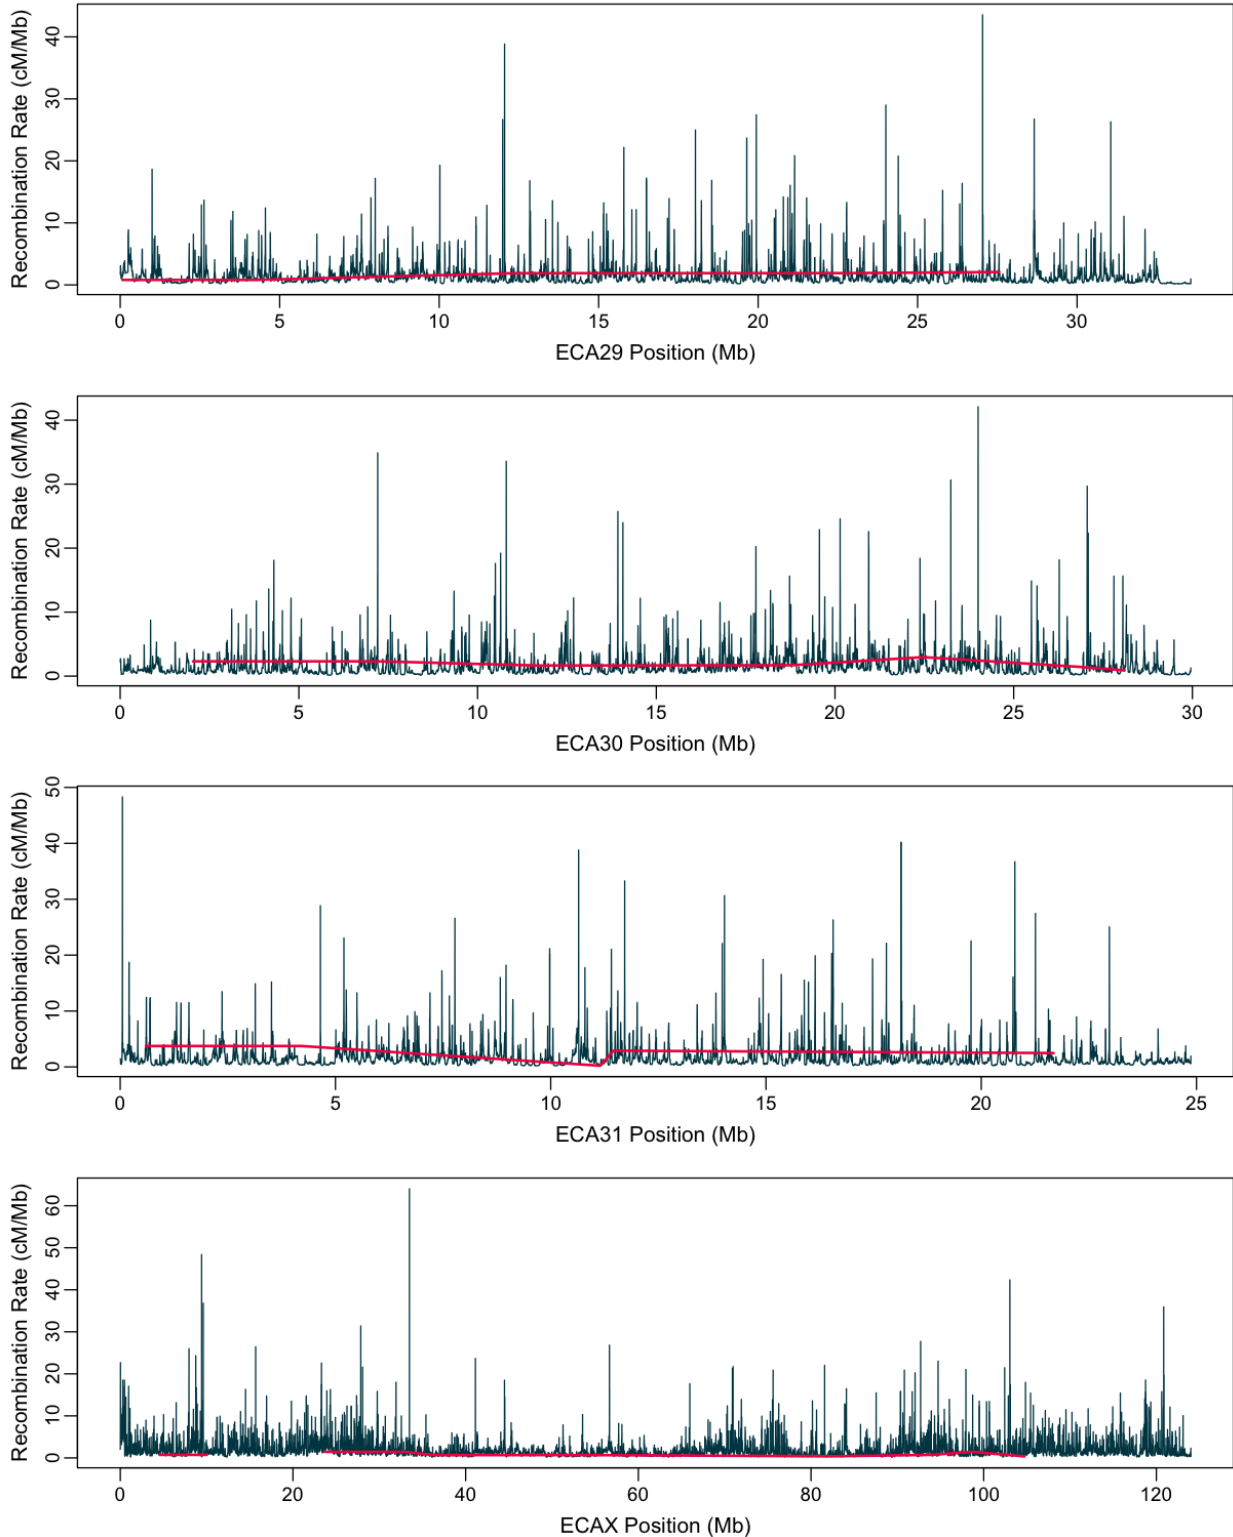

**Supplemental Figure S2.** Recombination rates across all 31 equine autosomes and Chromosome X (dark blue lines). Red lines represent recombination rates obtained from the linkage map created by Swinburne et al. (2006). Gaps in linkage map rates occur where microsatellites mapped out of order with the reference sequence.
