# Supplementary material for: Exploration of fine-scale recombination rate variation in the domestic horse
Source: PubMed Central journal article supplement — Genome Res. 2019 Oct;29(10):1744–52. doi: 10.1101/gr.243311.118 (PMC6771410; doi:10.1101/gr.243311.118), 2019-10
Supplement: supp_gr.243311.118_Supplemental_Fig_S3.pdf [file supp_gr.243311.118_Supplemental_Fig_S3.pdf]

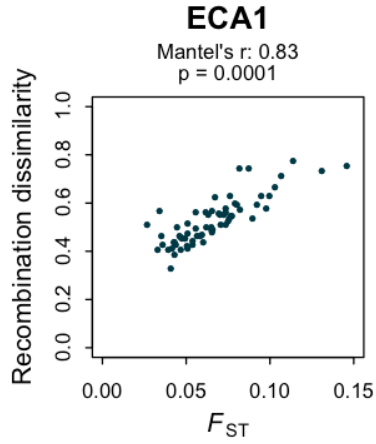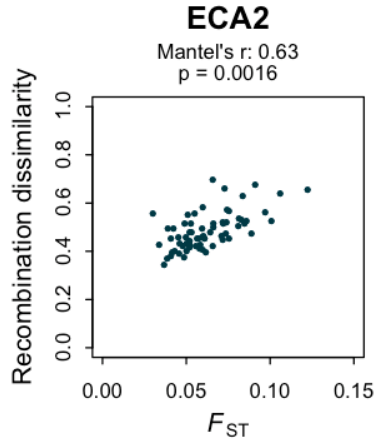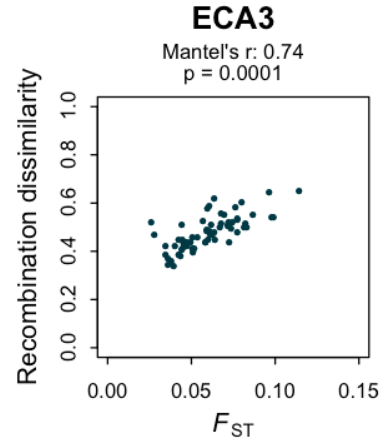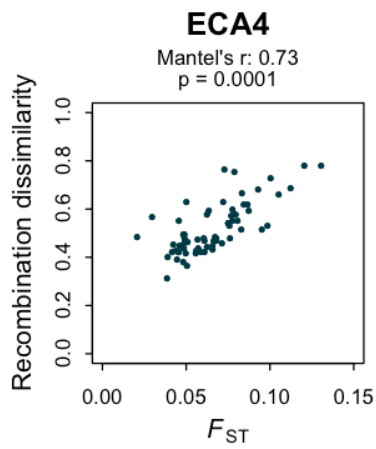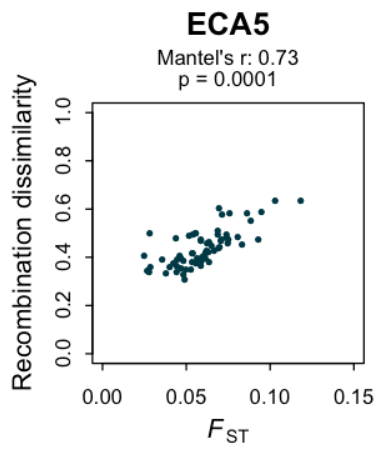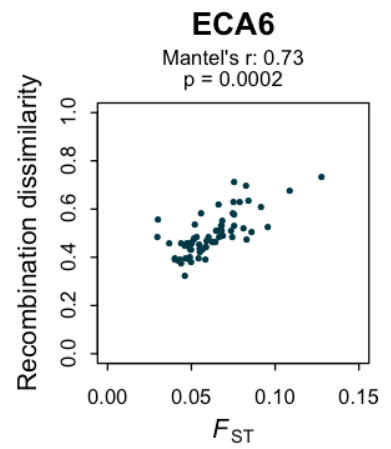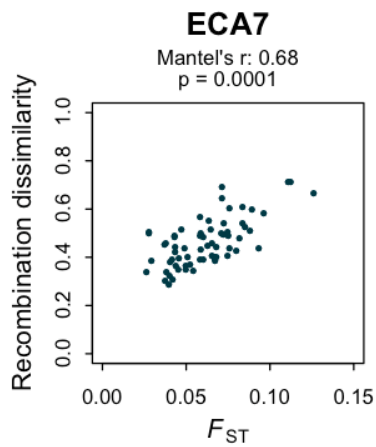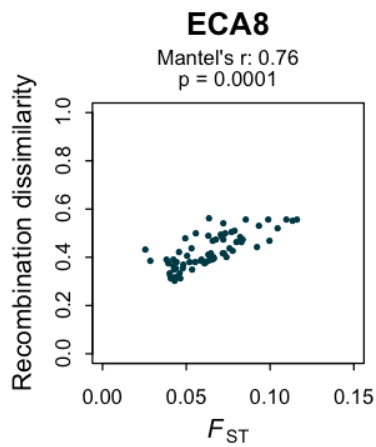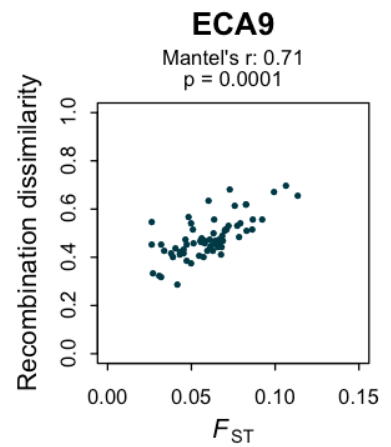

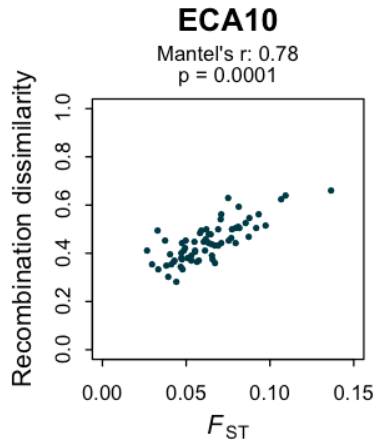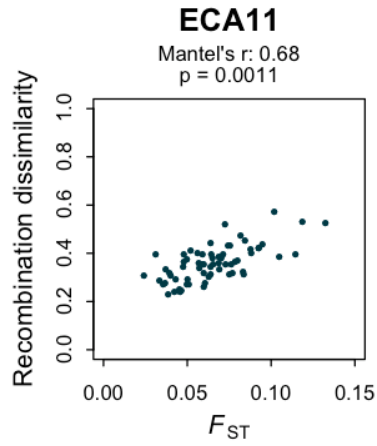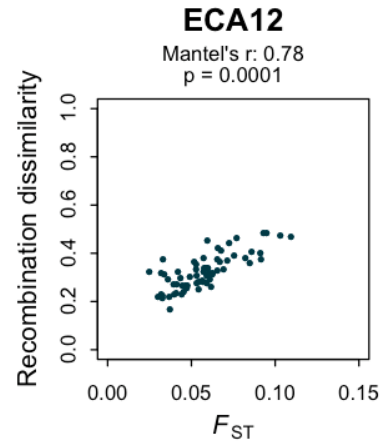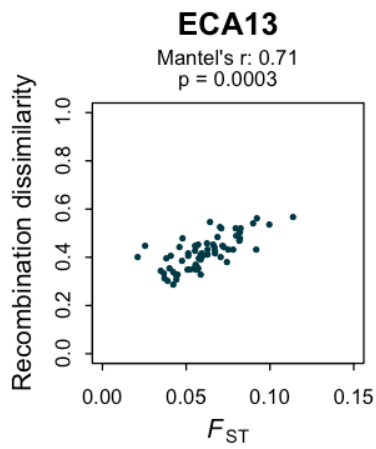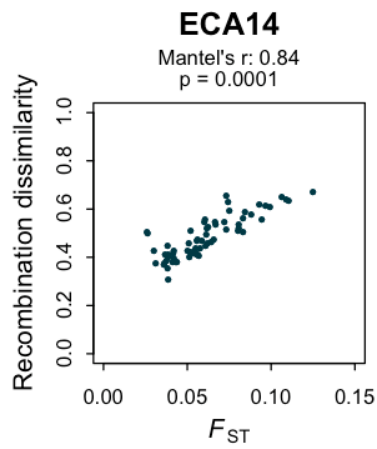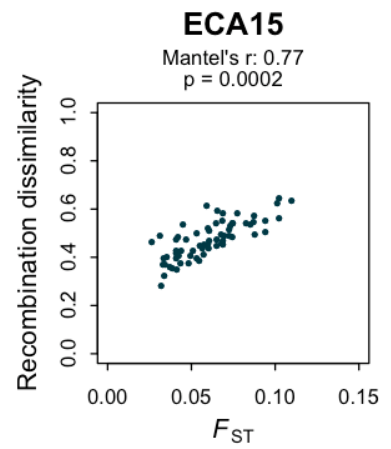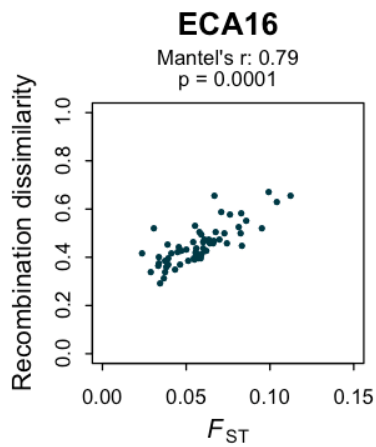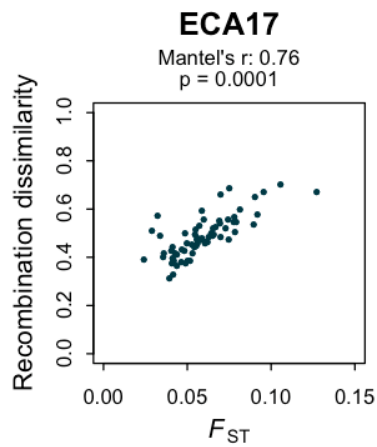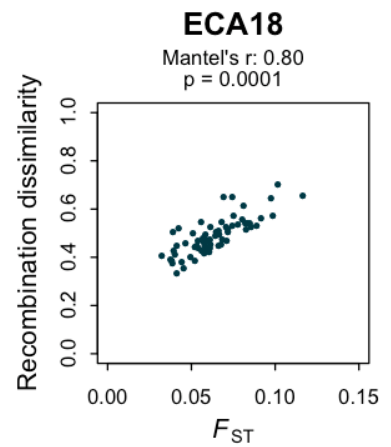

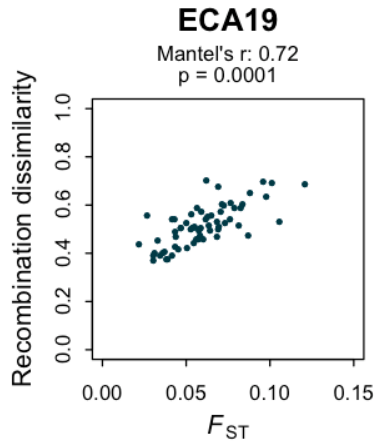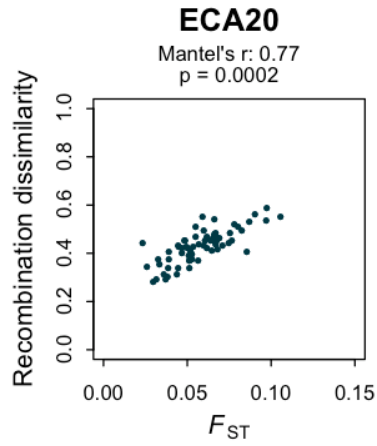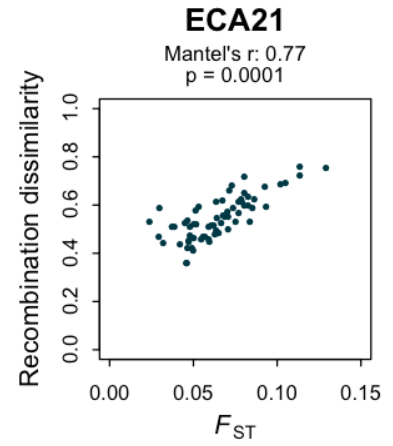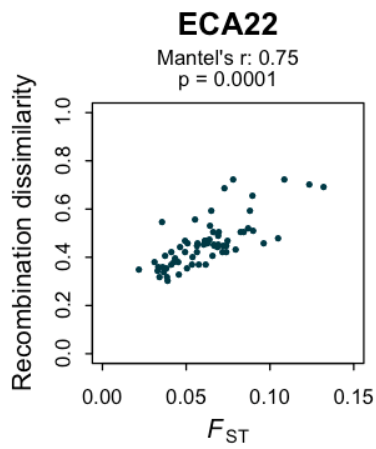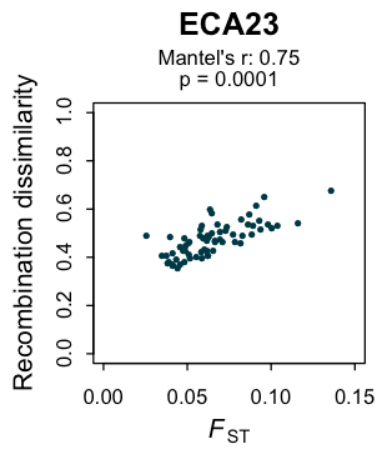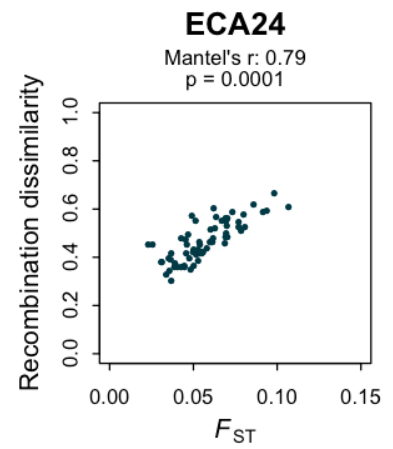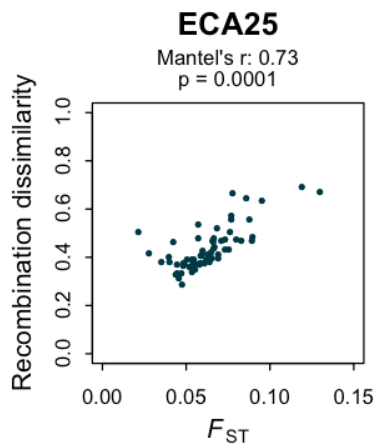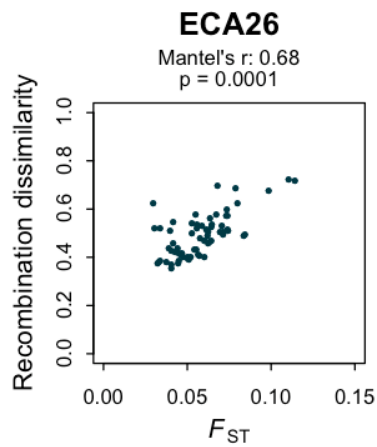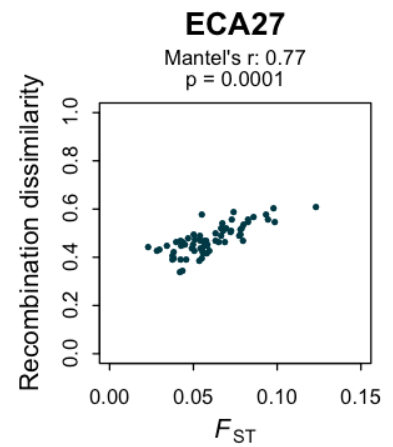

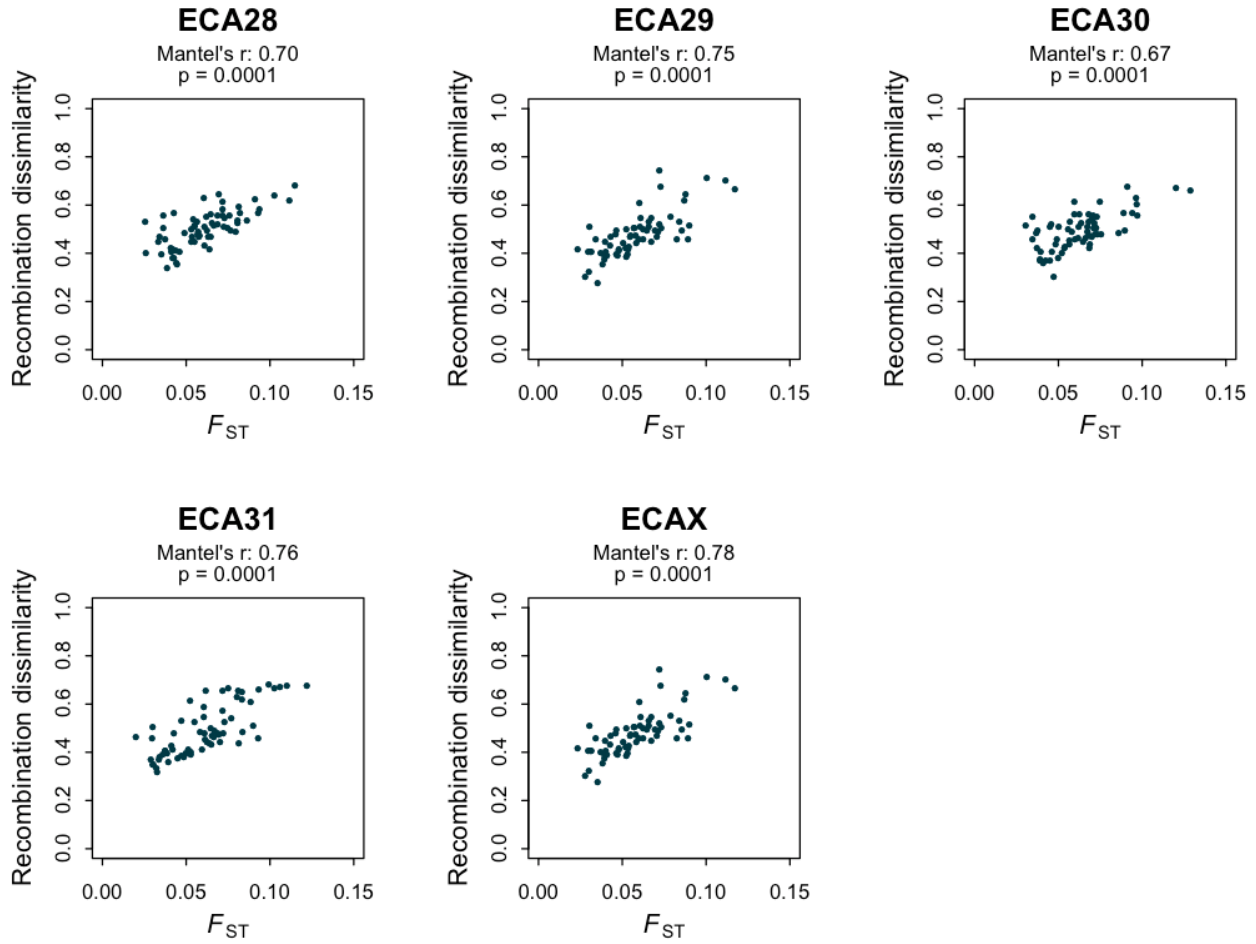

**Supplemental Figure S3.** Pairwise recombination dissimilarity vs.  $F_{ST}$  by chromosome. Recombination dissimilarity is  $1 - \text{Spearman's rank correlation coefficient}$  for recombination rates across the chromosome. Above each plot is the results of the Mantel test for matrix correlation.
