# Supplementary material for: Exploration of fine-scale recombination rate variation in the domestic horse
Source: PubMed Central journal article supplement — Genome Res. 2019 Oct;29(10):1744–52. doi: 10.1101/gr.243311.118 (PMC6771410; doi:10.1101/gr.243311.118), 2019-10
Supplement: supp_gr.243311.118_Supplemental_Fig_S4.pdf [file supp_gr.243311.118_Supplemental_Fig_S4.pdf]

| source | term name                                                                | term ID    | n. of term genes | corrected p-value | ARAB | BELGIAN | FM | FT | ICELANDIC | LUSTITANO | MAREMMANO | MORGAN | QH  | SB | TB | WP |     |
|--------|--------------------------------------------------------------------------|------------|------------------|-------------------|------|---------|----|----|-----------|-----------|-----------|--------|-----|----|----|----|-----|
| BP     | natural killer cell activation involved in immune response               | GO:0002323 | 33               | 1.41e-02          |      |         | 2  | 6  |           |           |           |        |     |    |    | 3  |     |
| BP     | organic acid transport                                                   | GO:0015849 | 230              | 1.73e-02          |      |         |    |    |           |           |           |        |     |    |    | 15 |     |
| BP     | organic acid transmembrane transport                                     | GO:1903825 | 102              | 6.39e-03          |      |         |    |    |           |           |           |        |     |    |    | 6  |     |
| BP     | amino acid transport                                                     | GO:0006865 | 107              | 2.10e-03          |      |         |    | 10 |           |           |           |        |     |    |    | 7  |     |
| BP     | carboxylic acid transmembrane transport                                  | GO:1905039 | 93               | 4.78e-03          |      |         |    |    | 10        |           |           |        |     |    |    | 7  |     |
| BP     | amino acid transmembrane transport                                       | GO:0003333 | 73               | 2.47e-03          |      |         |    |    | 9         |           |           |        |     |    |    | 7  |     |
| BP     | serine phosphorylation of STAT protein                                   | GO:0042501 | 33               | 1.41e-02          |      |         |    |    |           |           |           |        |     |    |    | 3  |     |
| BP     | regulation of peptidyl-serine phosphorylation of STAT protein            | GO:0033139 | 29               | 8.21e-03          |      |         |    |    |           |           |           |        |     |    |    | 3  |     |
| BP     | positive regulation of peptidyl-serine phosphorylation of STAT protein   | GO:0033141 | 27               | 5.25e-03          |      |         |    |    |           |           |           |        |     |    |    | 3  |     |
| BP     | organic anion transport                                                  | GO:0015711 | 335              | 2.39e-02          |      |         |    |    |           |           |           |        |     |    |    | 19 |     |
| BP     | immune system process                                                    | GO:0002376 | 1640             | 5.08e-07          | 74   | 17      | 39 | 75 | 25        | 14        | 56        | 76     |     |    |    | 53 |     |
| BP     | production of molecular mediator of immune response                      | GO:0002440 | 215              | 7.80e-15          | 26   | 18      | 9  | 8  | 11        | 30        | 20        | 26     | 9   | 12 |    |    | 22  |
| BP     | immunoglobulin production                                                | GO:0002377 | 160              | 3.19e-17          | 24   | 20      | 9  | 8  | 10        | 25        | 19        | 23     | 9   | 22 | 9  |    | 22  |
| BP     | antigen processing and presentation                                      | GO:0019882 | 95               | 1.31e-15          | 21   | 12      | 16 | 17 | 14        | 17        | 15        | 19     | 10  | 20 | 15 |    | 12  |
| BP     | antigen processing and presentation of peptide or polysaccharide ant ... | GO:0002504 | 23               | 4.72e-06          | 9    | 7       |    |    | 5         |           |           | 6      |     |    |    | 6  |     |
| BP     | antigen processing and presentation of peptide antigen                   | GO:0048002 | 50               | 1.12e-12          | 13   |         | 12 | 10 | 10        | 12        | 10        | 12     | 7   | 15 | 11 |    | 9   |
| BP     | antigen processing and presentation of peptide antigen via MHC class I   | GO:0002474 | 37               | 2.48e-13          | 10   |         | 10 | 8  | 9         | 8         | 8         | 10     |     | 14 | 10 |    |     |
| BP     | signaling                                                                | GO:0023052 | 5192             | 8.14e-05          |      |         |    |    | 19        | 19        |           |        |     |    |    |    | 11  |
| BP     | multicellular organismal process                                         | GO:0032501 | 5468             | 1.74e-04          |      |         |    |    | 14        |           | 20        |        |     |    |    |    |     |
| BP     | system process                                                           | GO:0003008 | 1954             | 1.87e-15          |      |         |    |    |           |           |           |        |     |    |    |    |     |
| BP     | nervous system process                                                   | GO:0050877 | 1525             | 7.25e-20          | 95   |         |    |    | 120       | 99        | 12        | 77     | 111 |    |    | 54 | 101 |
| BP     | sensory perception                                                       | GO:0007600 | 1291             | 1.19e-20          | 83   | 68      |    |    | 10        | 79        | 10        | 65     | 105 |    |    | 52 | 87  |
| BP     | sensory perception of chemical stimulus                                  | GO:0007606 | 1044             | 3.44e-22          | 76   | 61      |    |    | 95        | 71        | 10        | 60     | 96  |    |    | 49 | 72  |
| BP     | sensory perception of smell                                              | GO:0007608 | 971              | 1.46e-24          | 70   | 53      |    |    | 86        | 64        | 94        | 54     | 89  |    |    | 68 | 64  |
| BP     | response to stimulus                                                     | GO:0050896 | 6747             | 1.90e-11          | 70   | 53      |    |    | 85        | 64        | 94        | 54     | 88  |    |    | 68 | 49  |
| BP     | response to chemical                                                     | GO:0042221 | 3348             | 1.51e-07          | 240  | 20      |    |    | 22        | 26        | 47        | 24     | 19  | 22 | 17 | 98 | 12  |
| BP     | detection of stimulus                                                    | GO:0051606 | 1089             | 4.69e-22          |      |         |    |    | 13        | 12        | 14        |        |     |    |    | 51 | 82  |
| BP     | detection of chemical stimulus                                           | GO:0009593 | 1004             | 1.85e-23          | 71   | 54      |    |    | 87        | 65        | 96        | 56     | 90  |    |    | 53 | 70  |
| BP     | detection of stimulus involved in sensory perception                     | GO:0050906 | 1019             | 1.30e-23          | 70   | 53      |    |    | 85        | 64        | 94        | 55     | 89  |    |    | 68 | 64  |
| BP     | detection of chemical stimulus involved in sensory perception            | GO:0050907 | 985              | 4.35e-24          | 71   | 54      | 24 |    | 86        | 64        | 95        | 55     | 90  |    |    | 70 | 66  |
| BP     | detection of chemical stimulus involved in sensory perception o ...      | GO:0050911 | 952              | 3.21e-25          | 70   | 53      | 23 |    | 85        | 63        | 94        | 54     | 89  |    |    | 68 | 64  |
| BP     | immune response                                                          | GO:0006955 | 977              | 1.68e-10          | 70   | 53      | 23 |    | 85        | 63        | 94        | 54     | 88  |    |    | 68 | 49  |
| BP     | humoral immune response                                                  | GO:0006959 | 124              | 3.39e-02          | 66   | 60      | 37 | 62 | 46        | 64        | 47        | 57     | 16  | 45 |    | 8  |     |
| BP     | cellular response to stimulus                                            | GO:0051716 | 5795             | 4.68e-04          |      |         |    | 11 |           |           |           |        |     |    |    |    |     |
| BP     | cell communication                                                       | GO:0007154 | 5238             | 9.76e-05          |      |         |    |    | 20        |           | 20        |        |     |    |    |    | 11  |
| BP     | signal transduction                                                      | GO:0007165 | 4877             | 7.55e-06          |      |         |    |    | 19        |           | 19        |        |     |    |    |    | 10  |
| BP     | G-protein coupled receptor signaling pathway                             | GO:0007186 | 1585             | 5.98e-18          |      |         |    |    | 18        |           | 18        |        |     |    |    | 38 | 10  |
| BP     | serotonin receptor signaling pathway                                     | GO:0007210 | 25               | 4.23e-07          | 89   | 74      |    |    | 10        | 86        | 11        | 67     | 98  |    |    | 75 | 81  |
| BP     | G-protein coupled serotonin receptor signaling pathway                   | GO:0098664 | 25               | 4.23e-07          | 4    |         |    |    |           | 3         | 3         | 4      | 4   |    |    | 6  | 4   |
| BP     | response to exogenous dsRNA                                              | GO:0043330 | 49               | 1.68e-02          | 4    |         |    |    |           | 3         | 3         | 4      | 4   |    |    | 6  | 4   |
| BP     | granzyme-mediated apoptotic signaling pathway                            | GO:0008626 | 15               | 3.04e-06          | 4    |         |    |    |           | 3         | 3         | 4      | 4   |    |    | 6  | 4   |
| BP     | granzyme-mediated apoptotic signaling pathway                            | GO:0008626 | 15               | 3.04e-06          |      |         |    | 7  |           |           |           |        | 4   |    |    | 3  |     |
| BP     | granzyme-mediated apoptotic signaling pathway                            | GO:0008626 | 15               | 3.04e-06          |      |         |    |    |           |           |           |        | 4   |    |    | 3  |     |
| BP     | granzyme-mediated apoptotic signaling pathway                            | GO:0008626 | 15               | 3.04e-06          |      |         |    |    |           |           |           |        | 4   |    |    | 3  |     |
| BP     | granzyme-mediated apoptotic signaling pathway                            | GO:0008626 | 15               | 3.04e-06          | 6    | 4       | 3  | 4  |           |           |           |        | 5   | 6  | 6  | 6  | 4   |
| BP     | granzyme-mediated apoptotic signaling pathway                            | GO:0008626 | 15               | 3.04e-06          | 6    | 4       | 3  | 4  |           |           |           |        | 5   | 6  | 6  | 6  | 4   |
| BP     | granzyme-mediated apoptotic signaling pathway                            | GO:0008626 | 15               | 3.04e-06          | 6    | 4       | 3  | 4  |           |           |           |        | 5   | 6  | 6  | 6  | 4   |
| BP     | granzyme-mediated apoptotic signaling pathway                            | GO:0008626 | 15               | 3.04e-06          | 6    | 4       | 3  | 4  |           |           |           |        | 5   | 6  | 6  | 6  | 4   |
| BP     | granzyme-mediated apoptotic signaling pathway                            | GO:0008626 | 15               | 3.04e-06          | 6    | 4       | 3  | 4  |           |           |           |        | 5   | 6  | 6  | 6  | 4   |
| BP     | granzyme-mediated apoptotic signaling pathway                            | GO:0008626 | 15               | 3.04e-06          | 6    | 4       | 3  | 4  |           |           |           |        | 5   | 6  | 6  | 6  | 4   |
| BP     | granzyme-mediated apoptotic signaling pathway                            | GO:0008626 | 15               | 3.04e-06          | 6    | 4       | 3  | 4  |           |           |           |        | 5   | 6  | 6  | 6  | 4   |
| BP     | granzyme-mediated apoptotic signaling pathway                            | GO:0008626 | 15               | 3.04e-06          | 6    | 4       | 3  | 4  |           |           |           |        | 5   | 6  | 6  | 6  | 4   |
| BP     | granzyme-mediated apoptotic signaling pathway                            | GO:0008626 | 15               | 3.04e-06          | 6    | 4       | 3  | 4  |           |           |           |        | 5   | 6  | 6  | 6  | 4   |

  

| source | term name                       | term ID    | n. of term genes | corrected p-value | ARAB | BELGIAN | FM | FT | ICELANDIC | LUSTITANO | MAREMMANO | MORGAN | QH  | SB | TB | WP |
|--------|---------------------------------|------------|------------------|-------------------|------|---------|----|----|-----------|-----------|-----------|--------|-----|----|----|----|
| CC     | membrane                        | GO:0016020 | 7773             | 8.61e-06          |      |         |    |    |           |           |           |        |     |    |    | 67 |
| CC     | membrane part                   | GO:0044425 | 6023             | 9.49e-11          | 20   | 20      |    |    | 24        |           | 23        |        | 104 |    | 63 | 16 |
| CC     | membrane protein complex        | GO:0098796 | 566              | 3.70e-02          |      |         |    |    |           |           |           |        |     |    |    | 21 |
| CC     | plasma membrane protein complex | GO:0098797 | 202              | 3.46e-07          | 21   |         | 16 | 16 | 14        | 10        |           | 17     |     |    |    | 18 |
| CC     | MHC protein complex             | GO:0042611 | 36               | 2.22e-22          | 18   | 11      | 13 | 10 | 15        | 14        | 12        | 14     | 10  | 19 | 14 | 10 |
| CC     | MHC class I protein complex     | GO:0042612 | 20               | 2.71e-16          | 8    |         | 8  |    | 9         | 8         | 9         | 7      | 5   | 13 | 10 | 6  |
| CC     | MHC class II protein complex    | GO:0042613 | 16               | 1.34e-09          | 10   |         | 7  |    | 5         | 5         | 5         | 7      |     |    |    | 6  |
| CC     | intrinsic component of membrane | GO:0031224 | 5275             | 8.11e-13          | 19   | 18      | 15 | 15 | 22        | 16        | 22        | 17     | 14  | 18 | 60 | 15 |
| CC     | integral component of membrane  | GO:0016021 | 5228             | 1.24e-12          | 19   | 18      | 15 | 17 | 22        | 16        | 22        | 17     | 14  | 17 | 18 | 60 |
| CC     | cell periphery                  | GO:0071944 | 3991             | 1.67e-08          | 15   | 13      |    |    | 17        | 15        | 17        |        |     | 73 | 27 | 12 |
| CC     | plasma membrane                 | GO:0005886 | 3890             | 1.69e-09          | 15   | 13      |    |    | 16        | 15        | 17        |        |     | 73 | 27 | 12 |
| CC     | extracellular space             | GO:0005615 | 2846             | 4.85e-02          |      |         |    |    |           |           |           |        |     |    |    | 9  |
| CC     | extracellular space             | GO:0005615 | 2846             | 4.85e-02          |      |         |    |    |           |           |           |        |     |    |    | 9  |
| CC     | extracellular space             | GO:0005615 | 2846             | 4.85e-02          |      |         |    |    |           |           |           |        |     |    |    | 9  |
| CC     | extracellular space             | GO:0005615 | 2846             | 4.85e-02          |      |         |    |    |           |           |           |        |     |    |    | 9  |
| CC     | extracellular space             | GO:0005615 | 2846             | 4.85e-02          |      |         |    |    |           |           |           |        |     |    |    | 9  |

  

| source | term name                                          | term ID    | n. of term genes | corrected p-value | ARAB | BELGIAN | FM | FT | ICELANDIC | LUSTITANO | MAREMMANO | MORGAN | QH | SB  | TB | WP |    |
|--------|----------------------------------------------------|------------|------------------|-------------------|------|---------|----|----|-----------|-----------|-----------|--------|----|-----|----|----|----|
| MF     | sulfuric ester hydrolase activity                  | GO:0008484 | 18               | 4.25e-03          |      |         |    |    |           |           |           |        |    |     |    | 6  |    |
| MF     | organic acid transmembrane transporter activity    | GO:0005342 | 140              | 7.89e-03          |      |         |    |    |           |           |           |        |    |     |    | 9  |    |
| MF     | organic anion transmembrane transporter activity   | GO:0008514 | 189              | 1.04e-02          |      |         |    |    |           |           |           |        |    |     |    | 11 |    |
| MF     | carboxylic acid transmembrane transporter activity | GO:0046943 | 129              | 7.37e-03          |      |         |    |    |           |           |           |        |    |     |    | 7  |    |
| MF     | amino acid transmembrane transporter activity      | GO:0015171 | 81               | 3.09e-04          |      |         |    |    |           |           |           |        |    |     |    | 7  |    |
| MF     | signal transducer activity                         | GO:0004871 | 1950             | 2.58e-13          | 93   |         |    |    |           | 102       | 89        | 11     | 72 | 93  |    | 36 | 86 |
| MF     | molecular transducer activity                      | GO:0060089 | 1938             | 9.72e-16          | 98   | 79      |    |    |           | 11        | 95        | 11     | 75 | 98  |    | 80 | 64 |
| MF     | receptor activity                                  | GO:0004872 | 1904             | 2.34e-15          | 96   | 78      |    |    |           | 10        | 93        | 11     | 73 | 107 |    | 79 | 63 |
| MF     | transmembrane receptor activity                    | GO:0099600 | 1684             | 8.29e-17          | 92   | 73      |    |    |           | 102       | 87        | 11     | 70 | 101 |    | 50 | 62 |
| MF     | signaling receptor activity                        | GO:0038023 | 1733             | 7.68e-16          | 92   | 73      |    |    |           | 101       | 89        | 11     | 69 | 91  |    | 36 | 62 |
| MF     | neurotransmitter receptor activity                 | GO:0030594 | 85               | 8.95e-04          |      |         |    |    |           |           |           |        |    |     |    |    | 6  |
| MF     | transmembrane signaling receptor activity          | GO:0004888 | 1652             | 1.83e-17          | 92   | 72      |    |    |           | 10        | 87        | 11     | 68 | 100 |    | 50 | 62 |
| MF     | serotonin receptor activity                        | GO:0099589 | 31               | 1.73e-06          | 4    |         |    |    |           | 3         | 3         |        |    |     |    | 6  |    |
| MF     | G-protein coupled receptor activity                | GO:0004930 | 1321             | 5.52e-21          | 86   | 63      |    | </ |           |           |           |        |    |     |    |    |    |
