# Supplementary material for: Exploration of fine-scale recombination rate variation in the domestic horse
Source: PubMed Central journal article supplement — Genome Res. 2019 Oct;29(10):1744–52. doi: 10.1101/gr.243311.118 (PMC6771410; doi:10.1101/gr.243311.118), 2019-10
Supplement: supp_gr.243311.118_Supplemental_Fig_S5.pdf [file supp_gr.243311.118_Supplemental_Fig_S5.pdf]

| source | term name<br>Gene Ontology (Biological process)                   | term ID    | n. of<br>term<br>genes | corrected<br>p-value | ARAB | BELGIAN | FM | FT | ICELANDIC | LUSTIANO | MAREMMANO | MORGAN | QH | SB | TB | WP |
|--------|-------------------------------------------------------------------|------------|------------------------|----------------------|------|---------|----|----|-----------|----------|-----------|--------|----|----|----|----|
| BP     | regulation of protein deacetylation                               | GO:0090311 | 28                     | 3.87e-03             |      |         |    |    |           |          |           |        |    |    |    | 4  |
| BP     | aminoglycan catabolic process                                     | GO:0006026 | 23                     | 7.73e-04             |      |         |    |    |           |          |           |        |    |    |    | 5  |
| BP     | signaling                                                         | GO:0023052 | 5192                   | 6.73e-03             |      |         |    |    |           |          |           | 44     |    |    |    |    |
| BP     | response to stimulus                                              | GO:0050896 | 6747                   | 4.46e-02             |      |         |    |    |           |          |           | 50     |    |    |    |    |
| BP     | detection of stimulus                                             | GO:0051606 | 1089                   | 5.89e-08             |      |         |    |    |           |          |           | 24     | 36 |    |    |    |
| BP     | detection of chemical stimulus                                    | GO:0009593 | 1004                   | 2.79e-09             |      |         |    |    |           |          |           | 52     | 24 | 36 |    |    |
| BP     | system process                                                    | GO:0003008 | 1954                   | 7.29e-03             |      |         |    |    |           |          |           | 36     |    |    |    |    |
| BP     | nervous system process                                            | GO:0050877 | 1525                   | 5.52e-05             |      |         |    |    |           |          |           | 35     | 42 | 44 |    |    |
| BP     | sensory perception                                                | GO:0007600 | 1291                   | 2.90e-06             |      |         |    |    |           |          |           | 34     | 45 | 40 |    |    |
| BP     | sensory perception of chemical stimulus                           | GO:0007606 | 1044                   | 1.23e-08             |      |         |    |    |           |          |           | 52     | 24 | 37 |    |    |
| BP     | sensory perception of smell                                       | GO:0007608 | 971                    | 7.69e-10             |      |         |    |    |           |          |           | 52     | 24 | 36 |    |    |
| BP     | detection of stimulus involved in sensory perception              | GO:0050906 | 1019                   | 4.91e-09             |      |         |    |    |           |          |           | 52     | 24 | 36 |    |    |
| BP     | detection of chemical stimulus involved in sensory perception     | GO:0050907 | 985                    | 1.34e-09             |      |         |    |    |           |          |           | 52     | 24 | 36 |    |    |
| BP     | detection of chemical stimulus involved in sensory perception ... | GO:0050911 | 952                    | 3.56e-10             |      |         |    |    |           |          |           | 52     | 24 | 35 |    |    |
| BP     | cellular process                                                  | GO:0009987 | 14012                  | 1.06e-03             |      |         |    |    |           |          |           | 42     |    |    |    | 37 |
| BP     | cell communication                                                | GO:0007154 | 5238                   | 8.69e-03             |      |         |    |    |           |          |           | 44     |    |    |    |    |
| BP     | cellular response to stimulus                                     | GO:0051716 | 5795                   | 7.85e-03             |      |         |    |    |           |          |           | 47     |    |    |    |    |
| BP     | signal transduction                                               | GO:0007165 | 4877                   | 1.05e-03             |      |         |    |    |           |          |           | 44     |    |    |    |    |
| BP     | G-protein coupled receptor signaling pathway                      | GO:0007186 | 1585                   | 7.36e-08             |      |         |    |    |           |          |           | 39     | 17 | 42 |    |    |
| BP     | regulation of biological process                                  | GO:0050789 | 9088                   | 2.84e-02             |      |         |    |    |           |          |           | 50     |    |    |    |    |
| BP     | negative regulation of biological process                         | GO:0048519 | 3430                   | 1.12e-03             |      |         |    |    |           |          |           |        |    |    |    | 98 |
| BP     | negative regulation of cellular process                           | GO:0048523 | 3143                   | 2.64e-03             |      |         |    |    |           |          |           |        |    |    |    | 11 |
| BP     | negative regulation of metabolic process                          | GO:0009892 | 1900                   | 6.99e-04             |      |         |    |    |           |          |           |        |    |    |    | 42 |
| BP     | negative regulation of macromolecule metabolic process            | GO:0010605 | 1732                   | 3.57e-03             |      |         |    |    |           |          |           |        |    |    |    | 38 |
| BP     | negative regulation of nitrogen compound metabolic process        | GO:0051172 | 1632                   | 1.68e-02             |      |         |    |    |           |          |           |        |    |    |    | 35 |
| BP     | negative regulation of cellular metabolic process                 | GO:0031324 | 1750                   | 1.69e-03             |      |         |    |    |           |          |           |        |    |    |    | 39 |
| BP     | negative regulation of NLRP3 inflammasome complex assembly        | GO:1900226 | 3                      | 3.15e-02             | 2    |         |    |    |           |          |           |        |    |    |    |    |
| BP     | hyaluronan catabolic process                                      | GO:0030214 | 7                      | 8.19e-03             |      |         |    |    |           |          |           |        |    |    |    | 9  |
| BP     | protein-DNA complex subunit organization                          | GO:0071824 | 192                    | 1.75e-07             |      |         |    |    |           |          |           | 16     |    |    |    | 13 |
| BP     | macromolecular complex assembly                                   | GO:0065003 | 1227                   | 3.09e-02             |      |         |    |    |           |          |           |        |    |    |    | 20 |
| BP     | cellular macromolecular complex assembly                          | GO:0034622 | 799                    | 5.85e-03             |      |         |    |    |           |          |           |        |    |    |    | 18 |
| BP     | protein-DNA complex assembly                                      | GO:0065004 | 167                    | 1.14e-07             |      |         |    |    |           |          |           |        |    |    |    | 53 |
| BP     | organelle organization                                            | GO:0006996 | 2788                   | 2.11e-02             |      |         |    |    |           |          |           | 16     |    |    |    | 41 |
| BP     | chromosome organization                                           | GO:0051276 | 858                    | 3.47e-07             |      |         |    |    |           |          |           |        |    |    |    |    |
| BP     | DNA conformation change                                           | GO:0071103 | 193                    | 1.40e-06             |      |         |    |    |           |          |           |        |    |    |    |    |
| BP     | DNA packaging                                                     | GO:0006323 | 142                    | 6.00e-08             |      |         |    |    |           |          |           |        |    |    |    |    |
| BP     | chromatin organization                                            | GO:0006325 | 553                    | 1.47e-10             |      |         |    |    |           |          |           |        |    |    |    |    |
| BP     | chromatin assembly or disassembly                                 | GO:0006333 | 136                    | 2.83e-09             |      |         |    |    |           |          |           |        |    |    |    |    |
| BP     | chromatin assembly                                                | GO:0031497 | 117                    | 2.07e-09             |      |         |    |    |           |          |           |        |    |    |    |    |
| BP     | nucleosome organization                                           | GO:0034728 | 129                    | 1.07e-09             |      |         |    |    |           |          |           |        |    |    |    |    |
| BP     | nucleosome assembly                                               | GO:0006334 | 104                    | 2.52e-10             |      |         |    |    |           |          |           |        |    |    |    |    |
| BP     | negative regulation of histone deacetylation                      | GO:0031064 | 2                      | 2.26e-02             |      |         |    |    |           |          |           |        |    |    |    | 2  |
| BP     | negative regulation of megakaryocyte differentiation              | GO:0045653 | 7                      | 2.53e-02             |      |         |    |    |           |          |           |        |    |    |    | 3  |
| BP     | negative regulation of I-kappaB kinase/NF-kappaB signaling        | GO:0043124 | 42                     | 2.52e-02             |      |         |    |    |           |          |           |        |    |    |    | 4  |
| BP     | response to UV-B                                                  | GO:0010224 | 15                     | 3.32e-02             |      |         |    |    |           |          |           |        |    |    |    | 5  |
| BP     | cellular response to UV-B                                         | GO:0071493 | 7                      | 8.19e-03             |      |         |    |    |           |          |           |        |    |    |    | 9  |
| BP     | negative regulation of kinase activity                            | GO:0033673 | 193                    | 3.74e-02             |      |         |    |    |           |          |           |        |    |    |    | 9  |
| BP     | negative regulation of MAPK cascade                               | GO:0043409 | 105                    | 1.91e-02             |      |         |    |    |           |          |           |        |    |    |    | 9  |
| BP     | calcium activated phosphatidyserine scrambling                    | GO:0061589 | 4                      | 3.73e-02             |      |         |    |    |           |          |           |        |    |    |    | 9  |
| BP     | regulation of histone phosphorylation                             | GO:0033127 | 8                      | 1.03e-02             |      |         |    |    |           |          |           |        |    |    |    | 4  |

| source | term name<br>Gene Ontology (Cellular component)      | term ID    | n. of<br>term<br>genes | corrected<br>p-value | ARAB | BELGIAN | FM | FT | ICELANDIC | LUSTIANO | MAREMMANO | MORGAN | QH | SB | TB | WP |
|--------|------------------------------------------------------|------------|------------------------|----------------------|------|---------|----|----|-----------|----------|-----------|--------|----|----|----|----|
| CC     | nucleoplasm                                          | GO:0005654 | 2058                   | 1.32e-02             |      |         |    |    |           |          |           |        |    |    |    | 89 |
| CC     | membrane                                             | GO:0016020 | 7773                   | 4.30e-02             |      |         |    |    |           |          |           |        |    |    |    | 44 |
| CC     | membrane part                                        | GO:0044425 | 6023                   | 3.81e-03             |      |         |    |    |           |          |           |        |    |    |    | 33 |
| CC     | intrinsic component of membrane                      | GO:0031224 | 5275                   | 5.71e-04             |      |         |    |    |           |          |           |        |    |    |    | 32 |
| CC     | integral component of membrane                       | GO:0016021 | 5228                   | 4.55e-04             |      |         |    |    |           |          |           |        |    |    |    | 32 |
| CC     | organelle                                            | GO:0043226 | 9830                   | 1.90e-03             |      |         |    |    |           |          |           |        |    |    |    | 31 |
| CC     | membrane-bounded organelle                           | GO:0043227 | 8940                   | 5.68e-04             |      |         |    |    |           |          |           |        |    |    |    | 29 |
| CC     | organelle part                                       | GO:0044422 | 5774                   | 5.90e-03             |      |         |    |    |           |          |           |        |    |    |    | 28 |
| CC     | cell                                                 | GO:0005623 | 14128                  | 1.82e-03             |      |         |    |    |           |          |           |        |    |    |    | 26 |
| CC     | cell part                                            | GO:0044464 | 14089                  | 5.83e-03             |      |         |    |    |           |          |           |        |    |    |    | 26 |
| CC     | intracellular part                                   | GO:0044424 | 11151                  | 1.96e-02             |      |         |    |    |           |          |           |        |    |    |    | 31 |
| CC     | intracellular organelle                              | GO:0043229 | 8832                   | 5.99e-04             |      |         |    |    |           |          |           |        |    |    |    | 31 |
| CC     | intracellular organelle part                         | GO:0044446 | 5612                   | 1.83e-03             |      |         |    |    |           |          |           |        |    |    |    | 34 |
| CC     | intracellular membrane-bounded organelle             | GO:0043231 | 7514                   | 1.96e-04             |      |         |    |    |           |          |           |        |    |    |    | 29 |
| CC     | nucleus                                              | GO:0005634 | 5002                   | 6.48e-04             |      |         |    |    |           |          |           |        |    |    |    | 25 |
| CC     | endoplasmic reticulum-Golgi intermediate compartment | GO:0005793 | 46                     | 2.34e-02             |      |         |    |    |           |          |           |        |    |    |    | 18 |
| CC     | cell periphery                                       | GO:0071944 | 3991                   | 2.57e-05             |      |         |    |    |           |          |           |        |    |    |    | 42 |
| CC     | plasma membrane                                      | GO:0005886 | 3890                   | 1.16e-05             |      |         |    |    |           |          |           |        |    |    |    | 42 |
| CC     | DNA packaging complex                                | GO:0044815 | 97                     | 4.68e-17             |      |         |    |    |           |          |           |        |    |    |    | 15 |
| CC     | protein-DNA complex                                  | GO:0032993 | 164                    | 8.29e-14             |      |         |    |    |           |          |           |        |    |    |    | 13 |
| CC     | chromosome                                           | GO:0005694 | 750                    | 5.80e-07             |      |         |    |    |           |          |           |        |    |    |    | 18 |
| CC     | chromosomal part                                     | GO:0044427 | 695                    | 8.44e-07             |      |         |    |    |           |          |           |        |    |    |    | 17 |
| CC     | nuclear chromosome part                              | GO:0044454 | 419                    | 3.34e-02             |      |         |    |    |           |          |           |        |    |    |    | 15 |
| CC     | chromatin                                            | GO:0000785 | 415                    | 3.73e-09             |      |         |    |    |           |          |           |        |    |    |    | 17 |
| CC     | nuclear chromatin                                    | GO:0000790 | 264                    | 8.90e-03             |      |         |    |    |           |          |           |        |    |    |    | 17 |
| CC     | nucleosome                                           | GO:0000786 | 90                     | 7.28e-18             |      |         |    |    |           |          |           |        |    |    |    | 15 |
| CC     | hemoglobin complex                                   | GO:0005833 | 5                      | 2.16e-02             |      |         |    |    |           |          |           |        |    |    |    | 2  |

| source | term name<br>Gene Ontology (Molecular function) | term ID    | n. of<br>term<br>genes | corrected<br>p-value | ARAB | BELGIAN | FM | FT | ICELANDIC | LUSTIANO | MAREMMANO | MORGAN | QH | SB | TB | WP |
|--------|-------------------------------------------------|------------|------------------------|----------------------|------|---------|----|----|-----------|----------|-----------|--------|----|----|----|----|
| MF     | histone binding                                 | GO:0042393 | 149                    | 2.68e-03             |      |         |    |    |           |          |           |        |    |    |    | 16 |
| MF     | chitin binding                                  | GO:0008061 | 6                      | 1.25e-02             |      |         |    |    |           |          |           |        |    |    |    | 3  |
| MF     | glutathione transferase activity                | GO:0004364 | 27                     | 3.42e-02             |      |         |    |    |           |          |           |        |    |    |    | 4  |
| MF     | protein dimerization activity                   | GO:0046983 | 887                    | 5.61e-03             |      |         |    |    |           |          |           |        |    |    |    | 33 |
| MF     | protein heterodimerization activity             | GO:0046982 | 349                    | 7.54e-08             |      |         |    |    |           |          |           |        |    |    |    | 47 |
| MF     | signal transducer activity                      | GO:0004871 | 1950                   | 6.16e-06             |      |         |    |    |           |          |           |        |    |    |    | 18 |
| MF     | molecular transducer activity                   | GO:0060089 | 1938                   | 5.20e-06             |      |         |    |    |           |          |           |        |    |    |    | 26 |
| MF     | receptor activity                               | GO:0004872 | 1904                   | 3.52e-06             |      |         |    |    |           |          |           |        |    |    |    | 31 |
| MF     | transmembrane receptor activity                 | GO:0099600 | 1684                   | 2.79e-07             |      |         |    |    |           |          |           |        |    |    |    | 65 |
| MF     | signaling receptor activity                     | GO:0038023 | 1733                   | 5.15e-07             |      |         |    |    |           |          |           |        |    |    |    | 18 |
| MF     | transmembrane signaling receptor activity       | GO:0004888 | 1652                   | 1.85e-07             |      |         |    |    |           |          |           |        |    |    |    | 17 |
| MF     | olfactory receptor activity                     | GO:0004984 | 952                    | 3.56e-10             |      |         |    |    |           |          |           |        |    |    |    | 40 |
| MF     | G-protein coupled receptor activity             | GO:0004930 | 1321                   | 7.66e-08             |      |         |    |    |           |          |           |        |    |    |    | 38 |
| MF     | hyaluronoglucosaminidase activity               | GO:0004415 | 9                      | 1.95e-02             |      |         |    |    |           |          |           |        |    |    |    | 3  |
| MF     | glycine N-acyltransferase activity              | GO:0047961 | 4                      | 2.04e-02             |      |         |    |    |           |          |           |        |    |    |    | 3  |
| MF     | odorant binding                                 | GO:0005549 | 224                    | 3.31e-20             | 25   | 25      | 26 | 20 | 16        | 14       | 22        | 27     |    |    |    |    |
